# Supplementary material for: Novel porous organic polymers functionalized by metalloporphyrin and phosphonium salts for the efficient synergistic catalysis of CO2 conversion under mild conditions
Source: Royal Society of Chemistry journal article supplement (doi:10.1039/d2nj04210j), 2022-01-01
Supplement: d2nj04210j1.pdf [file d2nj04210j1.pdf]

## Supporting Information

### **Novel porous organic polymers functionalized by metalloporphyrin and phosphonium salt for efficient synergistic catalysis of CO<sub>2</sub> conversion under mild conditions**

Zhifeng Dai,<sup>1,2\*</sup> Shiting Wang,<sup>1</sup> Ning Zhou,<sup>1</sup> Yuxia Liu,<sup>1</sup> Yubing Xiong<sup>1,2\*</sup>

<sup>1</sup>Key Laboratory of Surface & Interface Science of Polymer Materials of Zhejiang Province, Department of Chemistry, Zhejiang Sci-Tech University, Hangzhou, 310018, Zhejiang Province, China.

<sup>2</sup>Longgang Institute of Zhejiang Sci-Tech University, Wenzhou 325802, China

Correspondence to: Prof. Dr. Yubing Xiong ([yubing\\_xiong@163.com](mailto:yubing_xiong@163.com))

## EXPERIMENT SECTION

**Synthesis of 4-vinylbenzaldehyde.** 4-Vinylbenzaldehyde was synthesized according to the previous reports [1]. Typically, magnesite powders (4.25 g, 170 mmol, 1.7 eq) was placed in a 250 mL round-bottom flask equipped with a magnetic stirring bar. After addition of anhydrous THF (50 mL) under N<sub>2</sub> atmosphere, 4-bromostyrene (18.32 g, 100 mmol, 1 eq) was slowly added into the flask in an ice water bath, followed by stirring at room temperature for 2 h. Then, DMF (7.32 g, 100 mmol, 1 eq) was slowly added into the solution in an ice water bath, and stirred at room temperature overnight. The reaction was quenched using saturated aqueous solution of NH<sub>4</sub>Cl, and the mixture was extracted by Ethyl acetate. The organic layer was filtered and concentrated. The residue was purified by silica gel chromatography (petroleum ether: ethyl acetate =10:1 v/v) to give 4-vinylbenzaldehyde as yellowish oil (9.78 g, 74.07% yield). 4-vinylbenzaldehyde was checked through <sup>1</sup>H NMR measurement, as illustrated in **Figure S3** in the Supporting Information. <sup>1</sup>H NMR (400 MHz, Chloroform-*d*) δ 9.99 (s, 1H), 7.84 (d, J = 8.3 Hz, 2H), 7.55 (d, J = 8.2 Hz, 2H), 6.77 (dd, J = 17.6, 10.9 Hz, 1H), 5.91 (d, J = 17.6 Hz, 1H), 5.44 (d, J = 10.9 Hz, 1H) ppm.

**Synthesis of quaternized poly(4-(diphenylphosphino)-styrene) (PPh<sub>2</sub>PStD).** A typical protocol is as follows: Ph<sub>2</sub>PSt (2.00 g, 7 mmol) and AIBN (12.3 mg, 0.075 mmol) were introduced into a round-bottomed flask with 10 mL DMF. After three freeze-thaw cycles under reduced pressure, the flask was recharged with nitrogen and placed in a preheated oil bath with a stirring bar. The polymerization was conducted at 65 °C for 24 h under N<sub>2</sub> atmosphere. Then, the solution was cooled down to room temperature. To afford the product, the as-obtained viscous solution was poured into abundant diethyl ether. White solid was produced and the raw product was collected by filtration. The product (PPh<sub>2</sub>PSt 1.64 g, 81.67% yield) was obtained after washing with diethyl ether and dried on vacuum at 50 °C overnight.

PPh<sub>2</sub>PSt (1.00 g) and 1-bromododecane (3.5 g, 14 mmol) were introduced into a round-bottomed flask with 10 mL DMF. The operation is the same as above. The final product (PPh<sub>2</sub>PStD 1.54 g, 89.28% yield) was obtained after washing with diethyl ether and dried on vacuum at 50 °C overnight.

**Synthesis of metalized PVPP (PCoVPP).** In a typical protocol, VPP (0.69 g, 0.9 mmol) were dissolved in NMP (5 mL), followed by the addition of AIBN (20 mg, 0.12 mmol). After treatment in an autoclave at 200 °C for 72 h, the reaction mixture was washed with DMF and purified using Soxhlet extraction (DCM, 72 h) to give the dark-purple product, which was denoted as PVPP (0.6814 g, 98.85% yield).

Typically, PVPP (0.30 g) and DMF (10 mL) were added into a 50 mL two neck round-bottom flask. After refluxing at 100 °C,  $\text{CoCl}_2 \cdot 6\text{H}_2\text{O}$  (0.51 g, 2.1 mmol) was added into the flask, and stirred at 100 °C overnight. After cooling down to room temperature, HCl (3.0 M, 60 mL) was added under air atmosphere to oxidize  $\text{Co}^{2+}$ . After reacted for 5 h, the product was obtained by filtration and washing with water several times. The solvent was removed and the as-obtained product (0.27 g, 88.9% yield) was dried in vacuum for 10 h at 80 °C.

**Leaching experiment on reactions of epoxides and  $\text{CO}_2$ .** The coupling reactions of  $\text{CO}_2$  with epoxides were performed in the 25 mL Schlenk tubes with  $\text{CO}_2$  balloons and magnetic stirrers. In a 25 mL Shrek tube was charged with catalyst and epoxide. The reaction mixture was degassed using three freeze-pump-thaw cycles, then a  $\text{CO}_2$  balloon was added to the tube and the reaction was stirred at 80°C for 24 hours. The catalyst was removed by filtration, the filtrate was added to a clean Shrek tube, the reaction mixture was degassed using three freeze-pump-thaw cycles, then a  $\text{CO}_2$  balloon was added to the tube, stirred at 80 °C and the reaction continued for 24 hours.  $^1\text{H}$  NMR confirmed the selectivity and conversion of the target product.

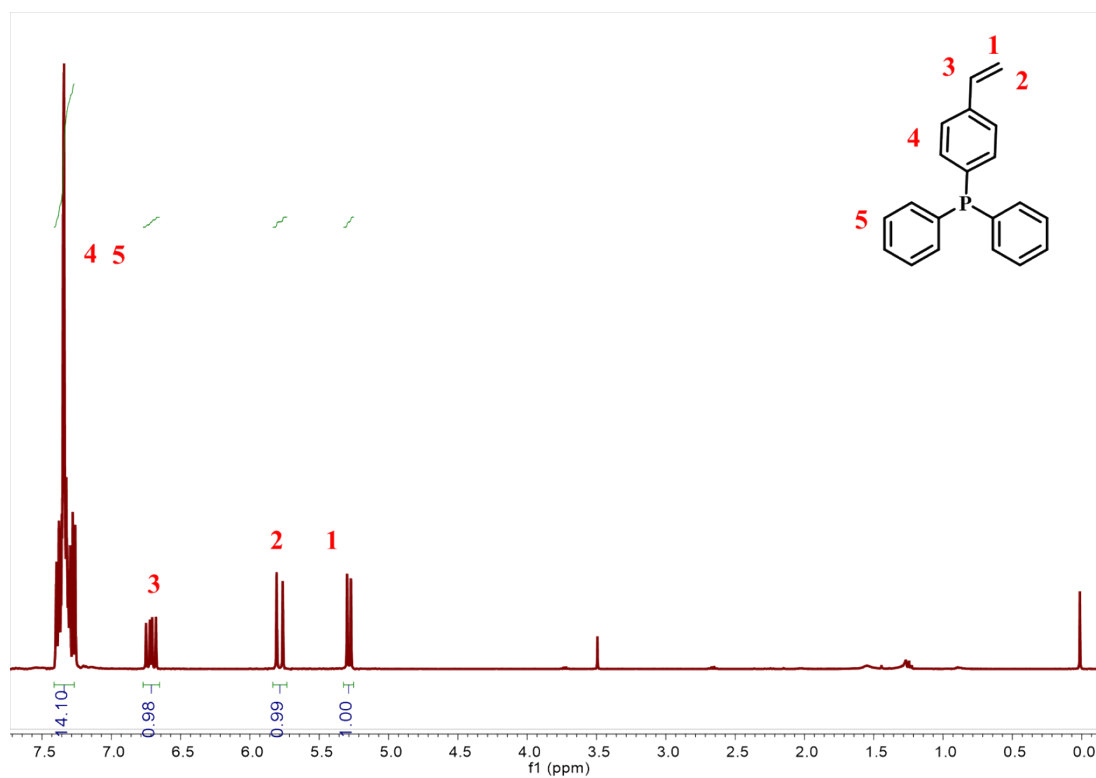

**Figure S1** <sup>1</sup>H NMR of the vinyl-functionalized phosphonium monomer 4-(diphenylphosphino) styrene (Ph<sub>2</sub>PSt).

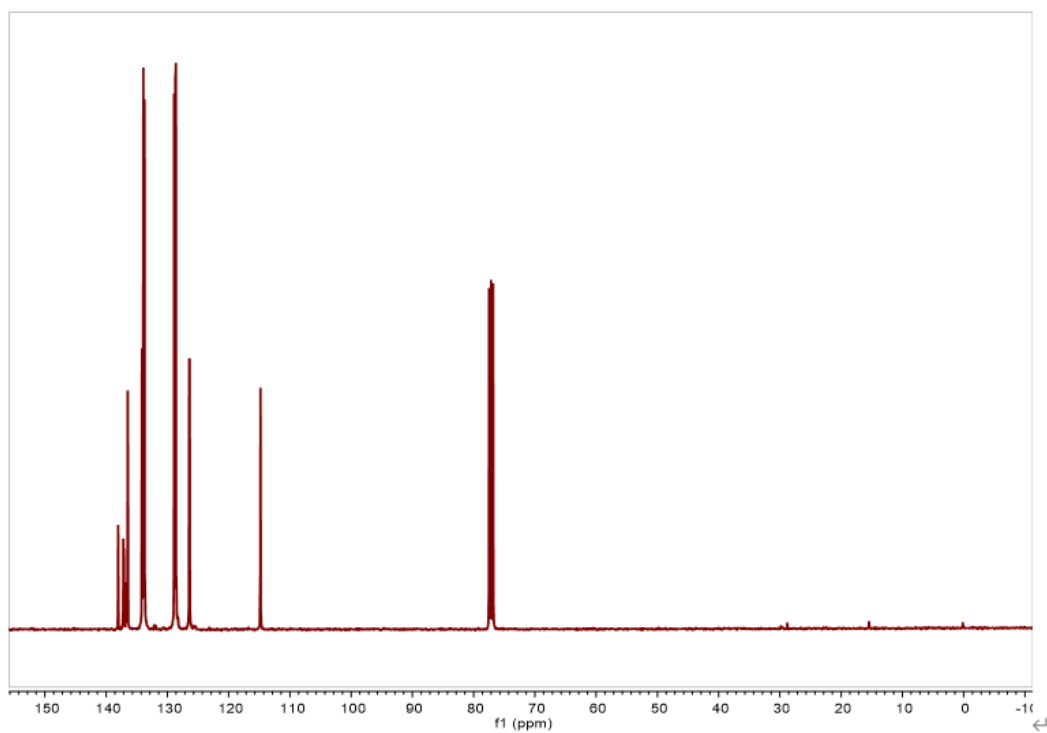

**Figure S2** <sup>13</sup>C NMR of the vinyl-functionalized phosphonium monomer 4-(diphenylphosphino) styrene (Ph<sub>2</sub>PSt).

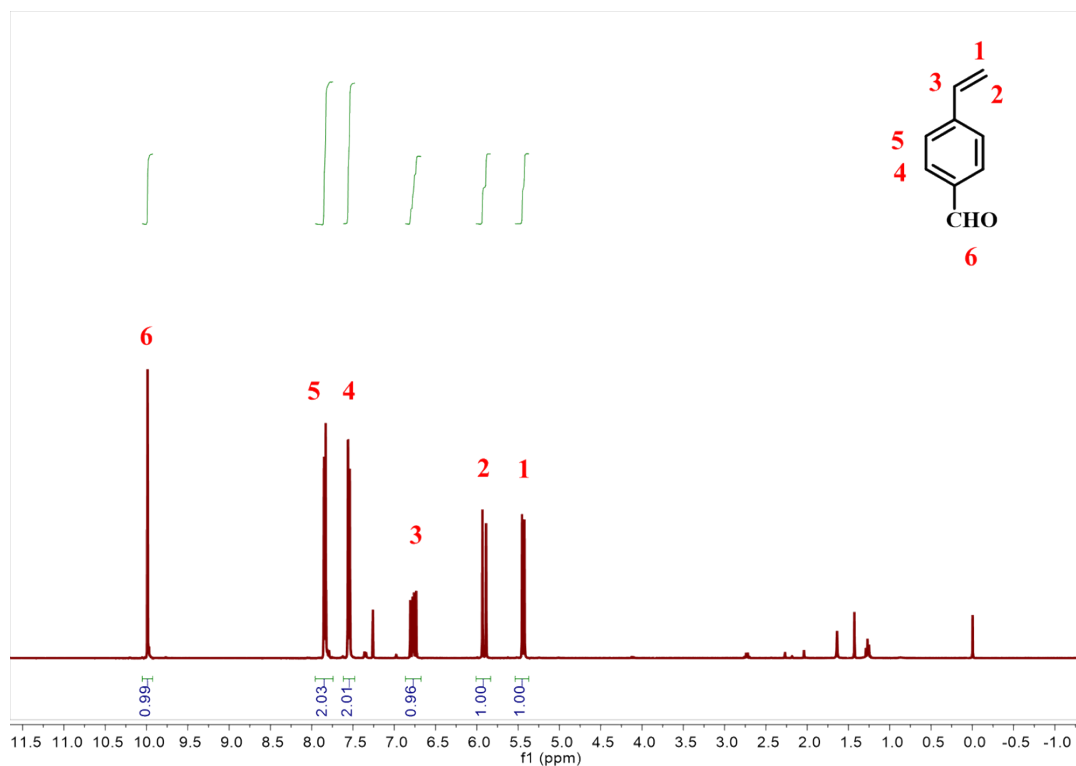

**Figure S3**  $^1\text{H}$  NMR of the vinyl-functionalized porphyrin monomer 4-vinylbenzaldehyde.

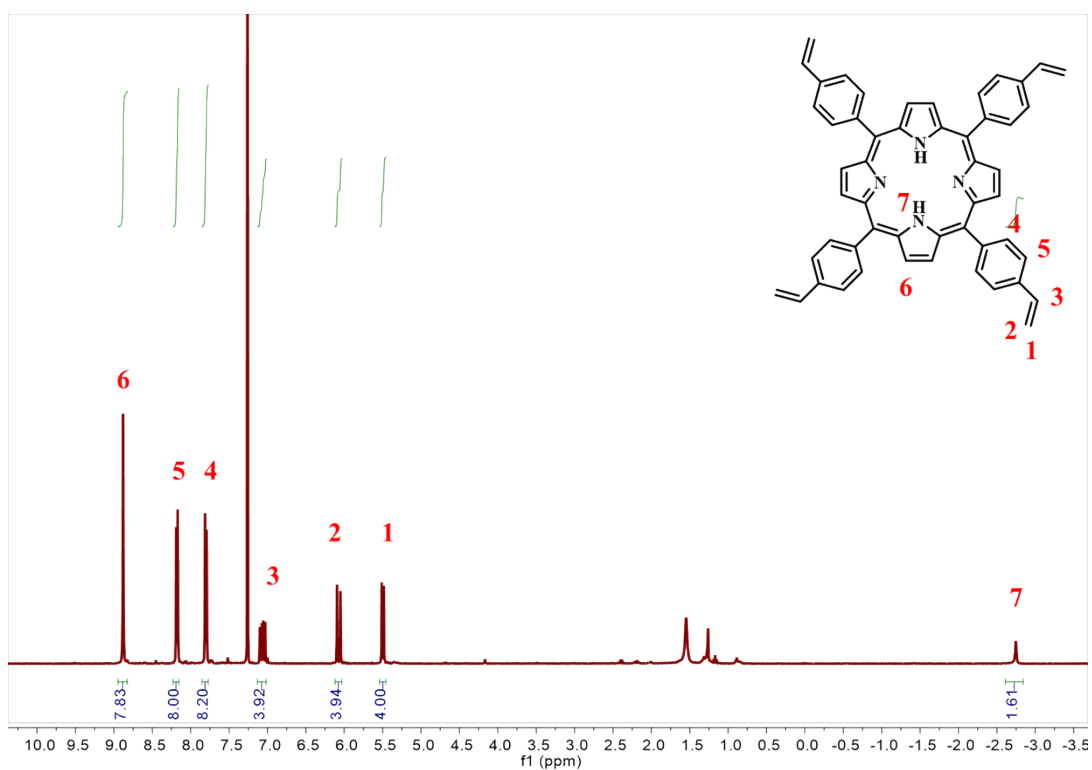

**Figure S4**  $^1\text{H}$  NMR of the vinyl-functionalized porphyrin monomer 5,10,15,20-tetrakis(4-vinylphenyl)-21H,23H-porphyrin (VPP).

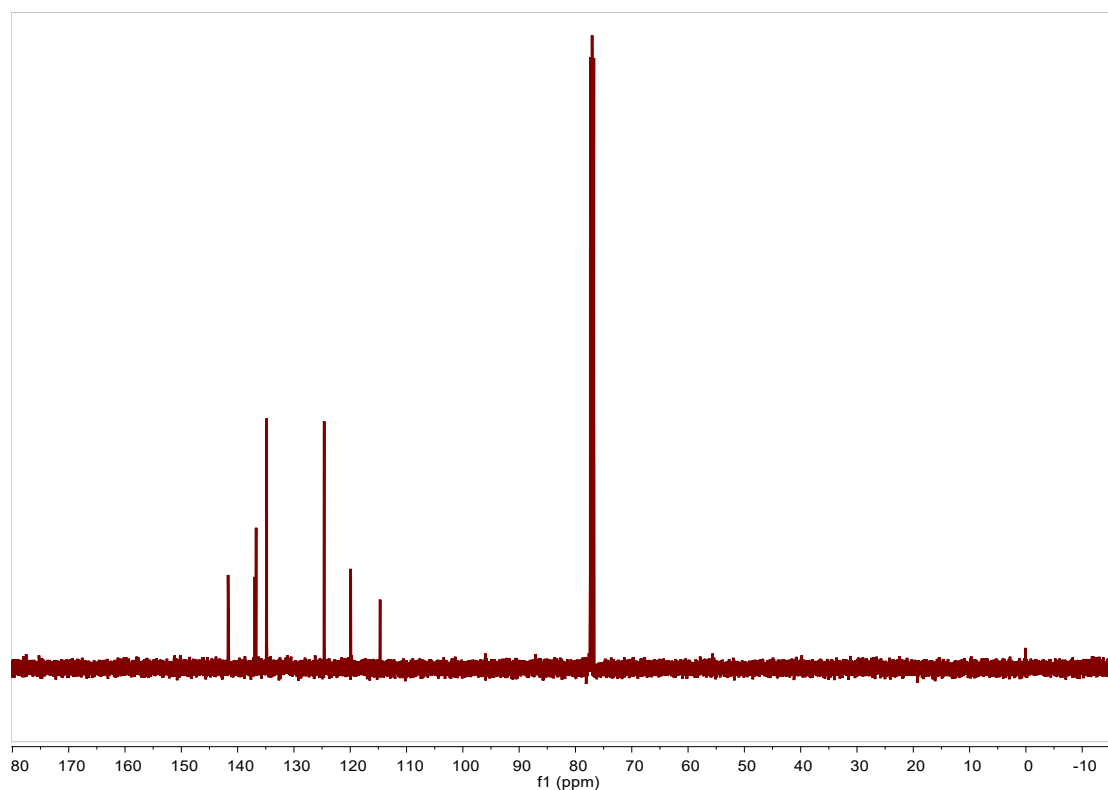

**Figure S5**  $^{13}\text{C}$  NMR of the vinyl-functionalized porphyrin monomer 5,10,15,20-tetrakis(4-vinylphenyl)-21H,23H-porphyrin (VPP).

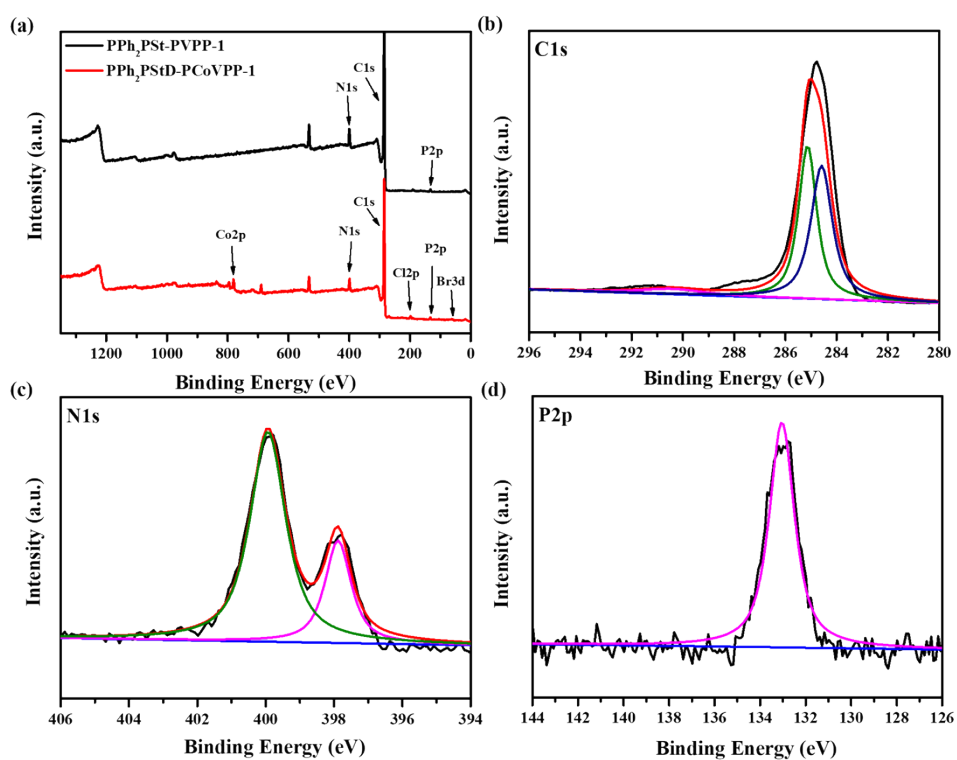

**Figure S6** (a) XPS full spectra of  $\text{PPh}_2\text{PSt-PVPP-1}$  and  $\text{PPh}_2\text{PStD-PCoVPP-1}$ ; (b)  $\text{C1s}$

spectrum, (c) N1s spectrum, (d) P2p spectrum of PPh<sub>2</sub>PS<sub>t</sub>-PVPP-1.

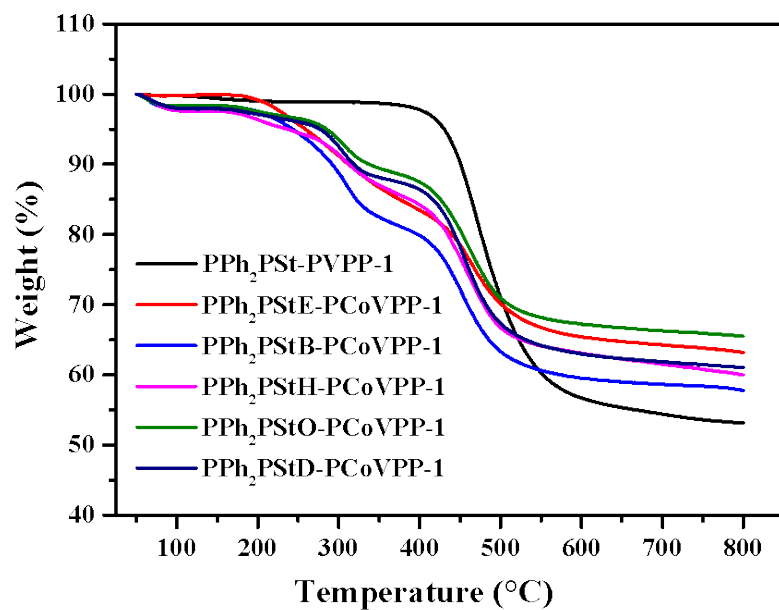

**Figure S7** TG curves of PPh<sub>2</sub>PS<sub>t</sub>-PVPP-1 and PPh<sub>2</sub>PS<sub>t</sub>R-PCoVPP-1.

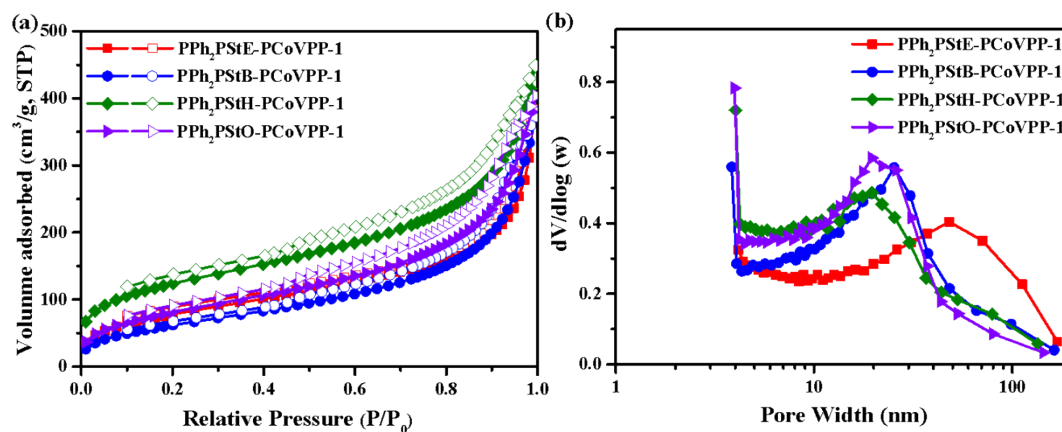

**Figure S8** N<sub>2</sub> sorption isotherms (a) and pore size distribution (b) of PPh<sub>2</sub>PS<sub>t</sub>E-PCoVPP-1, PPh<sub>2</sub>PS<sub>t</sub>B-PCoVPP-1, PPh<sub>2</sub>PS<sub>t</sub>H-PCoVPP-1 and PPh<sub>2</sub>PS<sub>t</sub>O-PCoVPP-1.

**Table S1** Textural parameters of heterogeneous catalysts.

| Entry | Catalysts                      | BET surface area<br>(m <sup>2</sup> /g) | Average pore width<br>(nm) | Pore volume<br>(cm <sup>3</sup> /g) |
|-------|--------------------------------|-----------------------------------------|----------------------------|-------------------------------------|
| 1     | PPh <sub>2</sub> PSt-PVPP-1    | 654.64                                  | 6.00                       | 0.95                                |
| 2     | PPh <sub>2</sub> PStE-PCoVPP-1 | 291.88                                  | 8.15                       | 0.59                                |
| 3     | PPh <sub>2</sub> PStB-PCoVPP-1 | 233.96                                  | 9.84                       | 0.58                                |
| 4     | PPh <sub>2</sub> PStH-PCoVPP-1 | 450.09                                  | 6.17                       | 0.69                                |
| 5     | PPh <sub>2</sub> PStO-PCoVPP-1 | 305.24                                  | 8.19                       | 0.63                                |
| 6     | PPh <sub>2</sub> PStD-PCoVPP-1 | 380.57                                  | 6.96                       | 0.64                                |

**Table S2** The relative content of each element of catalysts.

| Catalysts                      | Element (%) |      |      |      |      |      |
|--------------------------------|-------------|------|------|------|------|------|
|                                | C           | N    | P    | Co   | Cl   | Br   |
| PPh <sub>2</sub> PSt-PVPP-1    | 92.37       | 6.75 | 0.88 | -    | -    | -    |
| PPh <sub>2</sub> PStD-PCoVPP-1 | 90.1        | 6.22 | 1.31 | 1.16 | 1.04 | 0.17 |

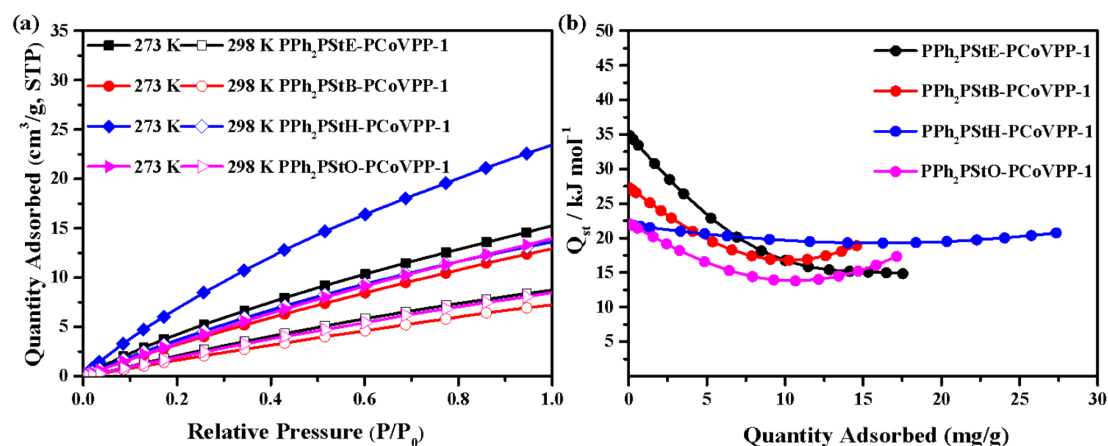

**Figure S9** (a) Gas sorption isotherm curves of different polymeric catalysts at 273 K (solid icons) and 298 K (hollow icons); (b) Isothermic heat ( $Q_{st}$ ) of CO<sub>2</sub> adsorption of PPh<sub>2</sub>PStE-PCoVPP-1, PPh<sub>2</sub>PStB-PCoVPP-1, PPh<sub>2</sub>PStH-PCoVPP-1 and PPh<sub>2</sub>PStO-PCoVPP-1.



**Table S3** Catalytic Performance of Catalysts in the Synthesis of Cyclic Carbonate with epoxides and CO<sub>2</sub>.

| Entry          | Catalysts                                       | Conversion (%) | TON    | TOF (h <sup>-1</sup> ) | Ref       |
|----------------|-------------------------------------------------|----------------|--------|------------------------|-----------|
| 1 <sup>a</sup> | PPh <sub>2</sub> PStD-PCoVPP-1                  | 98.9           | 594.15 | 12.38                  | This work |
| 2 <sup>b</sup> | SILP-5                                          | 89             | 19.1   | 2.7                    | Ref [4]   |
| 3 <sup>c</sup> | CILs-POF <sub>0.3</sub>                         | 83.6           | 279    | 11.6                   | Ref [5]   |
| 4 <sup>d</sup> | MFM-KUST                                        | 99.9           | 83.3   | 11.6                   | Ref [6]   |
| 5 <sup>e</sup> | Phenc <sup>+</sup> -PHP-2                       | 83             | 18.44  | 0.26                   | Ref [7]   |
| 6 <sup>f</sup> | ZnTCPPc(Br <sup>-</sup> )Etim-<br>UiO-66 (0.95) | 91.1           | 95     | 6.8                    | Ref [8]   |
| 7 <sup>g</sup> | [APmim][LAc]                                    | 94             | 188    | 13                     | Ref [9]   |

TON (turnover number) = [moles of initial substrate × conversion]/ [moles of active sites]. TOF (turnover frequency) = [mmol (product)]/ [mmol (active sites) × (reaction time)]

<sup>a</sup> Reaction conditions: ECH (20 mmol), catalyst (n<sub>CO<sub>3</sub><sup>+</sup></sub>)=0.0424 mmol, 0.1 MPa of CO<sub>2</sub>, 80 °C, 48 h. <sup>b</sup> Performed with a flow rate of 2 mL/min (1.98 mL/min scCO<sub>2</sub> and 0.02 mL/min propylene oxide/n-hexane 1:1; column: 4.5 mm ID × 150 mm). Column length 4.5 mm ID × 250 mm. <sup>c</sup> Reaction conditions: ECH (10 mmol), catalysts (30 μmol ionic sites), CO<sub>2</sub> pressure 10 bar, 90 °C, and 24 h. <sup>d</sup> Reaction conditions: catalyst (61.3 mg), epichlorohydrin (50 mmol), temperature (110 °C), CO<sub>2</sub> pressure (1.0 MPa), time (6.0 h), magnetic stirring rate (280 rpm). <sup>e</sup> Reaction conditions: epichlorohydrin (2 mmol), CO<sub>2</sub> pressure (0.1 MPa), the catalyst (40 mg), temperature (T = 60 °C), time (t = 72 h). <sup>f</sup> Reaction conditions: solvent free, Phenyl Glycidyl Ether (5 mmol), catalyst (0.95 mol % based on imidazolium), CO<sub>2</sub> (constant 1 bar), 140 °C, 14 h. <sup>g</sup> Reaction conditions: epichlorohydrin 5.0 mL, catalyst 0.5 mol%, 0.3 MPa, 80 °C, 14 h.

**Table S4.** Cycloaddition of epichlorohydrin with carbon dioxide catalyzed by PPh<sub>2</sub>PStD-PCoVPP-1 catalyst used for different run times <sup>a</sup>

| Entry | Catalysts                              | Co Loading (mmol/g) <sup>b</sup> | Conv. (%) <sup>c</sup> | Sele. (%) <sup>c</sup> |
|-------|----------------------------------------|----------------------------------|------------------------|------------------------|
| 1     | PPh <sub>2</sub> PStD-PCoVPP-1 (Run 1) | 0.581                            | 93.05                  | >99                    |
| 2     | PPh <sub>2</sub> PStD-PCoVPP-1 (Run 2) | 0.535                            | 87.81                  | >99                    |
| 3     | PPh <sub>2</sub> PStD-PCoVPP-1 (Run 3) | 0.517                            | 85.61                  | >99                    |
| 4     | PPh <sub>2</sub> PStD-PCoVPP-1 (Run 4) | 0.506                            | 85.07                  | >99                    |

<sup>a</sup> Reaction conditions: epichlorohydrin (20 mmol), catalyst (57.3 mg), 48 h, 80 °C, 1 atm CO<sub>2</sub>; <sup>b</sup> Co (mmol)/catalyst (g), determined by ICP; <sup>c</sup> Determined by <sup>1</sup>H NMR.

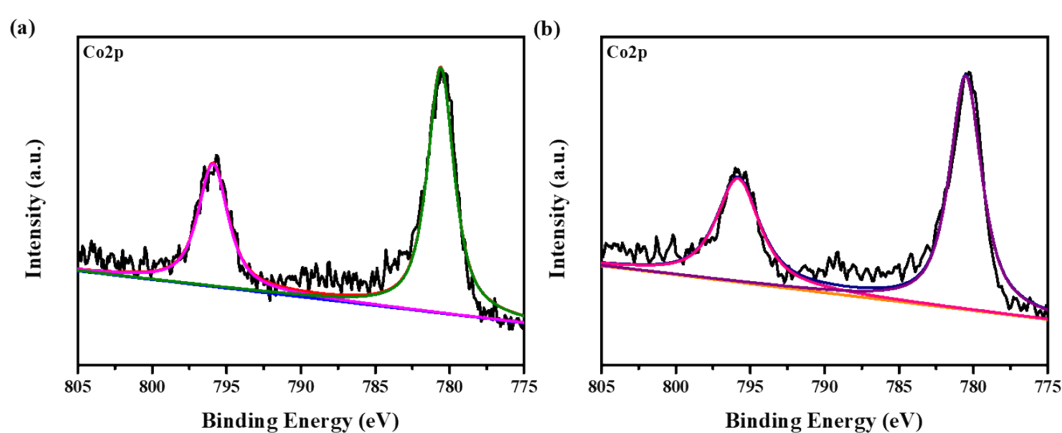

**Figure S10** Co2p XPS spectra of fresh(a) and recovered(b) PPh<sub>2</sub>PStD-PCoVPP-1.

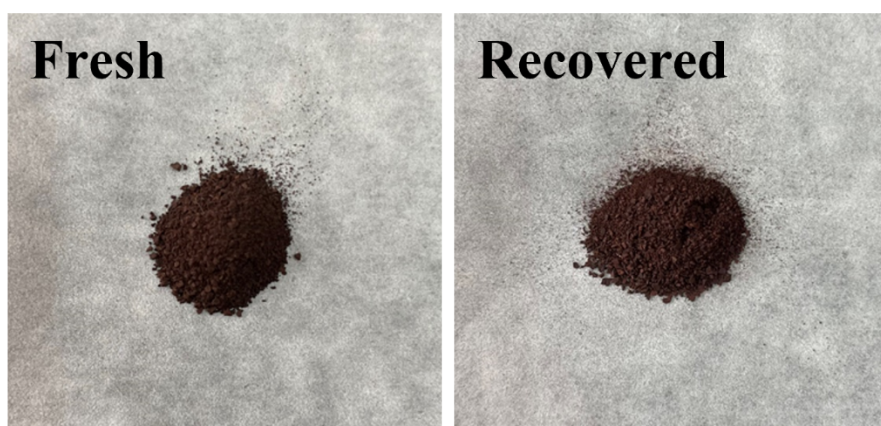

**Figure S11** The picture of fresh and recovered PPh<sub>2</sub>PStD-PCoVPP-1.

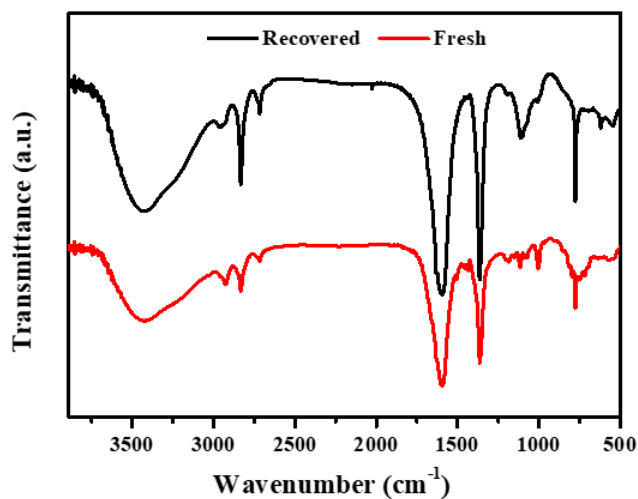

**Figure S12** FT-IR spectra of fresh and recovered PPh<sub>2</sub>PStD-PCoVPP-1.

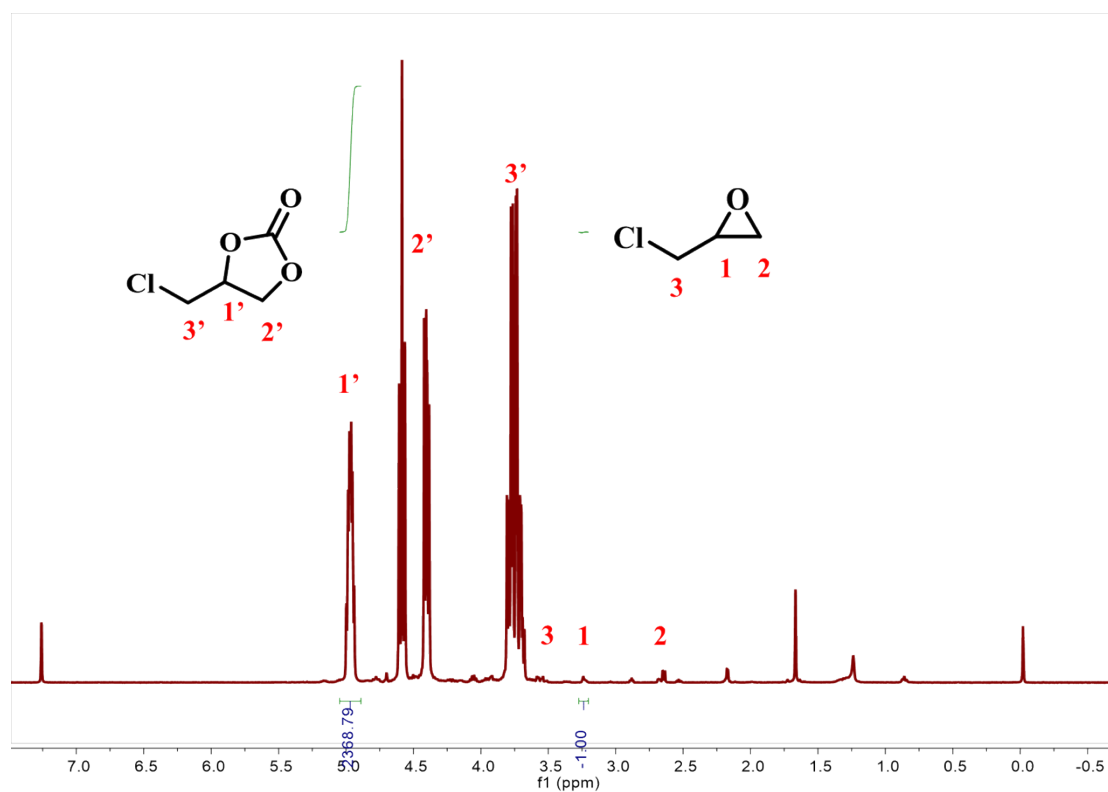

**Figure S13** <sup>1</sup>H liquid NMR of the crude products in the cycloaddition reaction catalyzed by the PPh<sub>2</sub>PStD-PCoVPP-1 catalyst with epichlorohydrin (ECH) as a substrate.

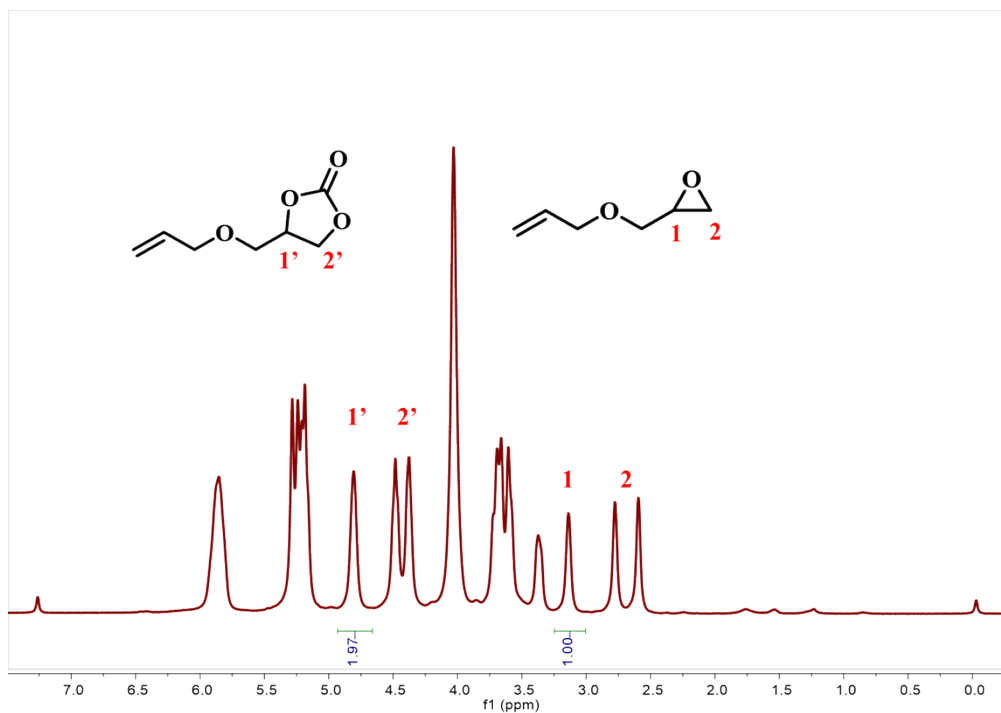

**Figure S14** <sup>1</sup>H liquid NMR of the crude products in the cycloaddition reaction catalyzed by the PPh<sub>2</sub>PStD-PCoVPP-1 catalyst with allyl glycidyl ether as a substrate.

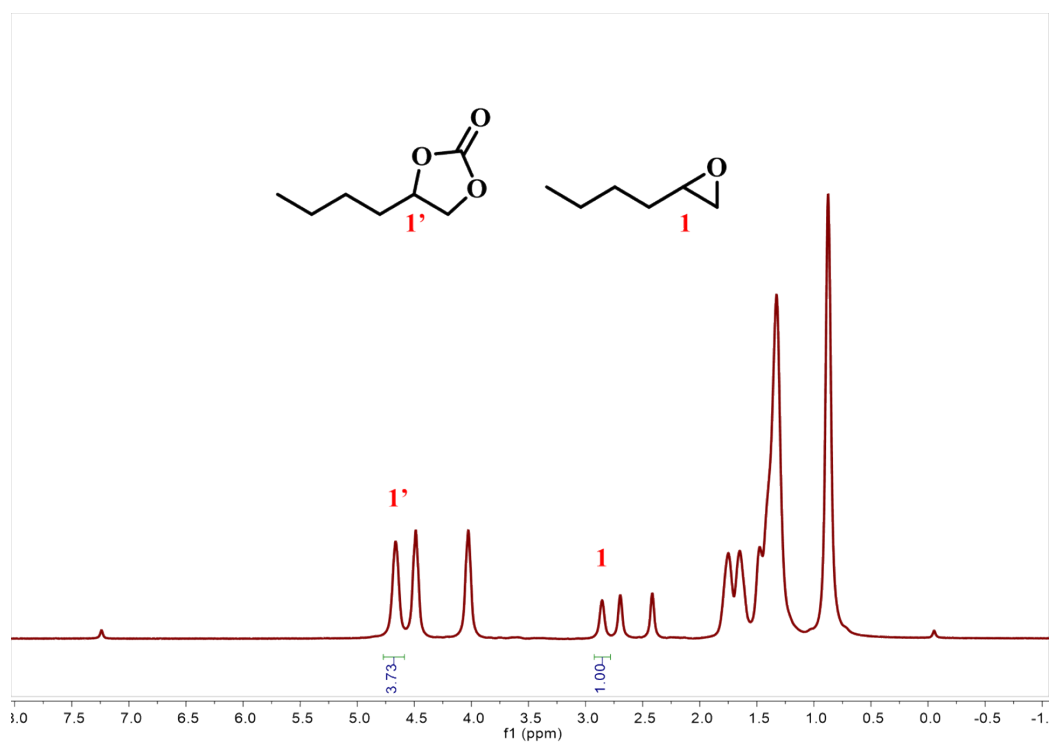

**Figure S15** <sup>1</sup>H liquid NMR of the crude products in the cycloaddition reaction catalyzed by the PPh<sub>2</sub>PStD-PCoVPP-1 catalyst with 1,2-hexylene oxide as a substrate.

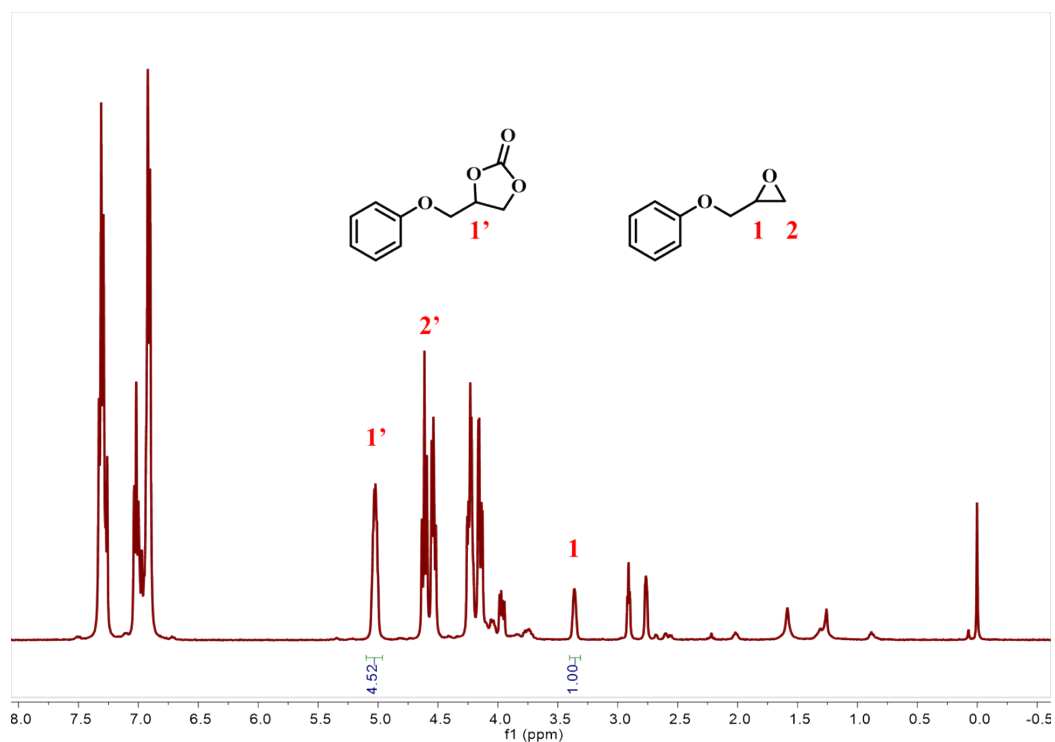

**Figure S16** <sup>1</sup>H liquid NMR of the crude products in the cycloaddition reaction catalyzed by the PPh<sub>2</sub>PStD-PCoVPP-1 catalyst with allyl glycidyl ether as a substrate.

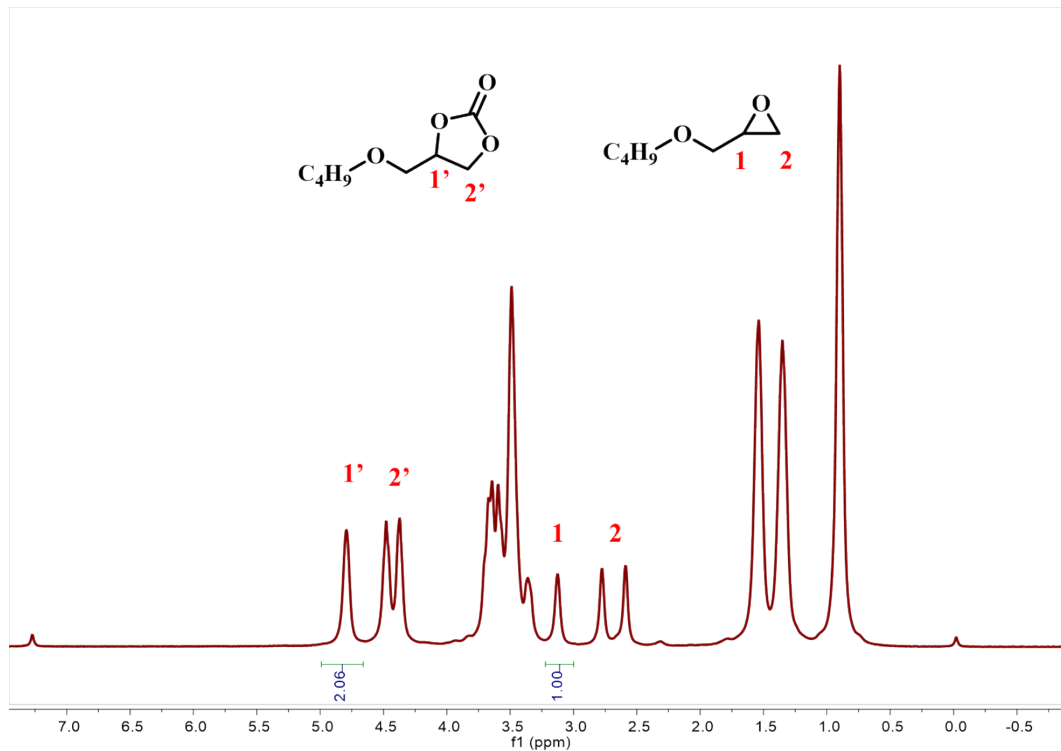

**Figure S17** <sup>1</sup>H liquid NMR of the crude products in the cycloaddition reaction catalyzed by the PPh<sub>2</sub>PStD-PCoVPP-1 catalyst with butyl glycidyl ether as a substrate.

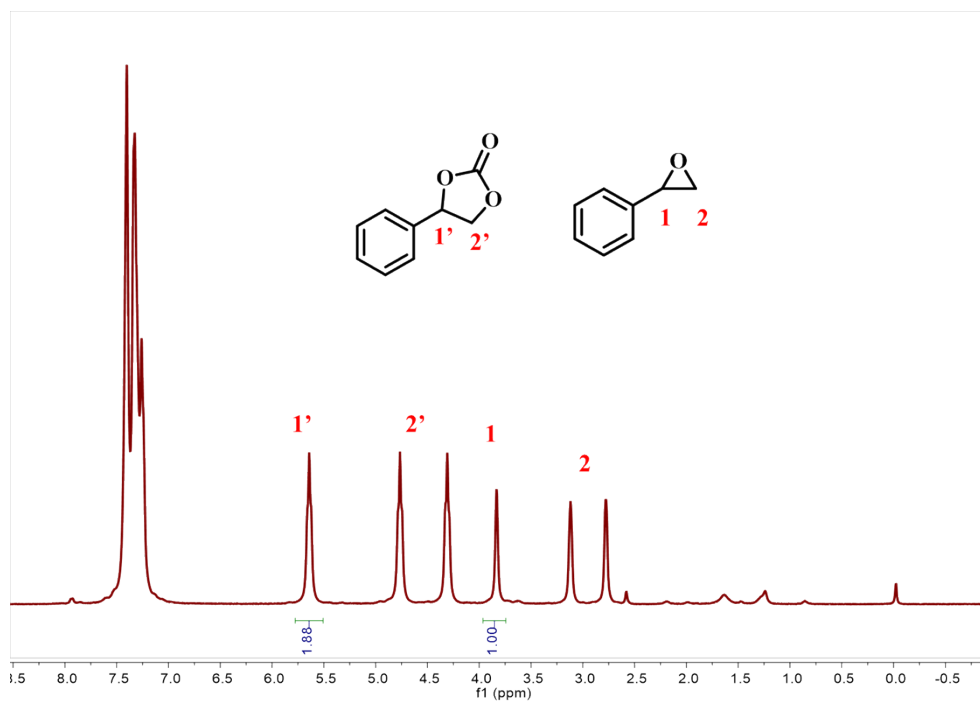

**Figure S18**  $^1\text{H}$  NMR of the crude products in the cycloaddition reaction catalyzed by the  $\text{PPh}_2\text{PStD-PCoVPP-1}$  catalyst with styrene oxide as a substrate.

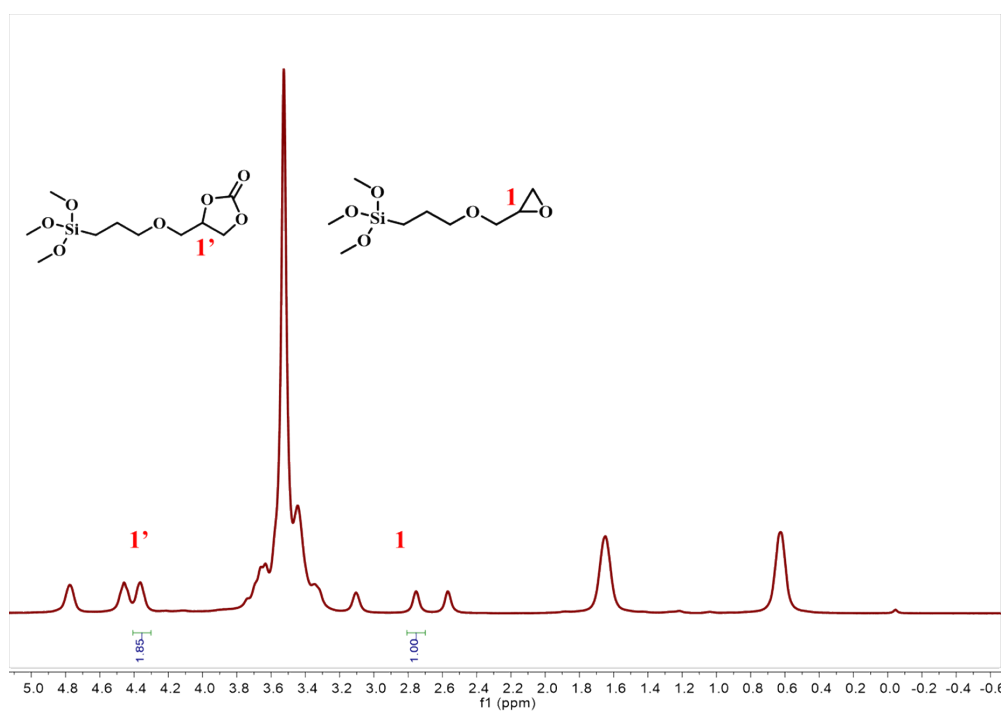

**Figure S19**  $^1\text{H}$  NMR of the crude products in the cycloaddition reaction catalyzed by the  $\text{PPh}_2\text{PStD-PCoVPP-1}$  catalyst with 3-glycidoxypropyltrimethoxysilane as a substrate.

## REFERENCES

- [1] Z. F. Dai, Q. Sun, X. L. Liu, C. Q. Bian, Q. M. Wu, S. X. Pan, L. Wang, X. J. Meng, F. Deng, F. S. Xiao, *J. Catal.* 2016, **338**, 202–209.
- [2] A. S. Martinez, C. Hauzenberger, A. R. Sahoo, Z. Csendes, H. Hoffmann, K. Bica, *ACS Sustainable Chem. Eng.*, 2018, **6**, 13131–13139.
- [3] Y. L. Yang, Y. L. Guo, J. L. Yuan, H. B. Xie, C. T. Gao, T. X. Zhao, Q. Zheng, *ACS Sustainable Chem. Eng.*, 2022, **10**, 7990–8001.
- [4] Z. X. Yue, T. D. Hu, H. Y. Su, W. B. Zhao, Y. Li, H. Zhao, Y. L. Liu, Y. Liu, H. Zhang, L. H. Jiang, X. N. Tang, S. Y. Shan, Y. F. Zhi, *Fuel*, 2022, **326**, 125007.
- [5] G. J. Chen, Y. D. Zhang, K. Liu, X. Q. Liu, L. Wu, H. Zhong, X. J. Dang, M. M. Tong, Z. Y. Long, *J. Mater. Chem. A.*, 2021, **9**, 7556–7565.
- [6] J. Liang, Y. Q. Xie, Q. Wu, X. Y. Wang, T. T. Liu, H. F. Li, Y. B. Huang, R. Cao, *Inorg. Chem.*, 2018, **57**, 2584–2593.
- [7] S. Yue, H. L. Qu, X. X. Song, S. L. Zang, G. C. Deng, *Catal. Sci. Technol.*, 2021, **11**, 6999–7008.
